# Supplementary material for: Female rats with severe left ventricle volume overload exhibit more cardiac hypertrophy but fewer myocardial transcriptional changes than males
Source: PubMed Central journal article supplement (PMC5429715; doi:10.1038/s41598-017-00855-9), 2017-04-07
Supplement: 41598_2017_855_MOESM1_ESM.pdf [file 41598_2017_855_MOESM1_ESM.pdf]

Female rats with severe left ventricle volume overload exhibit more cardiac hypertrophy but fewer myocardial transcriptional changes than males.

Catherine Beaumont<sup>1</sup>, Élisabeth Walsh-Wilkinson<sup>1</sup>, Marie-Claude Drolet, Élise Roussel, Marie Arsenault\* and Jacques Couet\*.

Groupe de recherche sur les valvulopathies, Centre de Recherche, Institut universitaire de cardiologie et de pneumologie de Québec, Université Laval, Quebec City, Canada.

Running title: Sex differences in rats with aortic valve regurgitation.

<sup>1</sup>: These authors have contributed equally to this work.

\*Corresponding authors: Jacques Couet PhD and Marie Arsenault MD

Groupe de Recherche en Valvulopathies, Centre de Recherche,  
Institut universitaire de cardiologie et de pneumologie de Québec  
2725, Chemin Sainte-Foy, Québec, (Québec), Canada, G1V 4G5

Phone: 1-418-656-4760; Fax: 1-418-656-4509

Email: jacques.couet@med.ulaval.ca or marie.arsenault@criucpq.ulaval.ca

**Table S1.** Primer Assays used in qPCR analysis of gene expression.

| mRNA                                                                                                 | Symbol             | Cat. No.              | Amplicon (bp) |
|------------------------------------------------------------------------------------------------------|--------------------|-----------------------|---------------|
| acetyl CoA acyltransferase 2                                                                         | Acaa2              | Rn.PT.58.5300756      | 111           |
| acyl CoA déshydrogenase, very long chain                                                             | Acadvl             | Rn.PT.58.13279450     | 147           |
| acetyl CoA acetyltransferase 1                                                                       | Acat1              | Rn.PT.58.18447027     | 102           |
| acyl-CoA thioesterase 2 (Acotinase-2)                                                                | Acot2              | QT00407204            | 77            |
| solute carrier family 25, member 4                                                                   | Ant1,<br>Slc25a4   | QT01081633            | 143           |
| ATPase, Ca <sup>++</sup> transporting, cardiac                                                       | Atp2a2,<br>Serca2a | QT01081500            | 96            |
| ATP synthase, H <sup>+</sup> transporting, mitochondrial F1 complex, alpha subunit 1, cardiac muscle | Atp5a1             | Rn.PT.58.6992257      | 100           |
| solute carrier family 25 (carnitine/acylcarnitine translocase), member 20                            | Cat,<br>Slc25a20   | Rn.PT.58.6247859      | 116           |
| procollagen-1 alpha-1                                                                                | Col1a              | Rn.PT.58.7562513      | 134           |
| procollagen-3 alpha-1                                                                                | Col3               | QT01083537            | 111           |
| cytochrome c oxidase subunit 5B                                                                      | Cox5b              | Rn.PT.58.8467954      | 138           |
| cartinine palmitoyltransferase 1b, muscle                                                            | CPT1b              | QT01084069            | 98            |
| carnitine palmitoyltransferase 2                                                                     | CPT2               | QT00186473            | 150           |
| carnitine O-acetyltransferase                                                                        | Crat               | Rn.PT.58.36282119     | 97            |
| connective tissue growth factor                                                                      | Ctgf               | QT00182021            | 102           |
| 2,4-dienoyl CoA reductase 1                                                                          | Decr1              | Rn.PT.58.44352482     | 120           |
| enoyl CoA hydratase 1                                                                                | Ech1               | Rn.PT.58.33832465     | 99            |
| enoyl CoA delta isomerase 1                                                                          | Eci1               | Rn.PT.58.37662439     | 119           |
| enoyl CoA hydratase, short chain, 1, mitochondrial                                                   | EchS1              | Non-optimized primers | 95            |
| enolase 3, beta                                                                                      | Eno3               | QT00180138            | 106           |
| estrogen related receptor, alpha                                                                     | Erra               | Rn.PT.58.5170310      | 111           |
| estrogen related receptor, gamma                                                                     | Errg               | Rn.PT.58.8028733      | 109           |
| fatty acid translocase/CD36, similar to                                                              | FAT/CD36           | QT01702680            | 81            |
| GA binding protein transcription factor, alpha                                                       | Gabpa              | Rn.PT.58.12555216     | 137           |
| solute carrier family 2 member 1                                                                     | Glut1, Slc2a1      | QT00178024            | 85            |
| solute carrier family 2 member 4                                                                     | Glut4, Slc2a4      | QT00175931            | 146           |
| hydroxyacyl-CoA dehydrogenase                                                                        | Hadh               | Rn.PT.58.17867024     | 135           |
| hydroxyacyl-CoA dehydrogenase alpha                                                                  | Hadha              | Rn.PT.58.46222281     | 138           |
| hydroxyacyl-CoA dehydrogenase beta                                                                   | Hadhb              | Rn.PT.58.7613498      | 130           |
| Lysyl oxidase                                                                                        | Lox                | QT00185591            | 148           |
| mitofusin 1                                                                                          | Mfn1               | Rn.PT.58.44207597     | 106           |
| mitofusin 2                                                                                          | Mfn2               | Rn.PT.58.13375660     | 124           |

|                                                                       |               |                       |     |
|-----------------------------------------------------------------------|---------------|-----------------------|-----|
| myosin, heavy polypeptide 6, cardiac                                  | Myh6          | QT00190267            | 127 |
| myosin, heavy polypeptide 7, cardiac                                  | Myh7          | QT00189504            | 144 |
| NADH:ubiquinone oxidoreductase subunit A4                             | Ndufa4        | Rn.PT.58.11318539     | 134 |
| natriuretic peptide precursor type A                                  | Nppa, Anp     | QT00366170            | 94  |
| Natriuretic peptide precursor type B                                  | Nppb          | Rn.PT.58.5595685.g    | 108 |
| pyruvate dehydrogenase alpha 1                                        | pdha1         | QT01830220            | 93  |
| pyruvate dehydrogenase kinase, isozyme 4                              | Pdk4          | QT00189287            | 145 |
| peroxisome proliferator activated receptor gamma, coactivator 1 alpha | Pgc1 $\alpha$ | QT00189196            | 108 |
| peroxisome proliferator activated receptor alpha                      | Ppar $\alpha$ | QT00176575            | 66  |
| cyclophilin a                                                         | Ppia          | QT00177394            | 106 |
| retinoid X receptor gamma                                             | Rxr $\gamma$  | Rn.PT.58.6519292      | 103 |
| ryanodine Receptor 2, cardiac                                         | Ryr2          | QT01811936            | 60  |
| succinate dehydrogenase complex iron sulfur subunit B                 | Sdhb          | Rn.PT.58.9629097      | 110 |
| sirtuin 1                                                             | Sirt1         | Non-optimized primers | 94  |
| transcription factor A, mitochondrial                                 | Tfam          | Rn.PT.58.13772978     | 124 |
| transient receptor potential cation channel, subfamily C, member 6    | Trpc6         | QT00195804            | 101 |
| uncoupling protein 3                                                  | Ucp3          | QT00176589            | 103 |
| voltage-dependent anion channel 1                                     | Vdac1         | Rn.PT.58.37188705     | 116 |

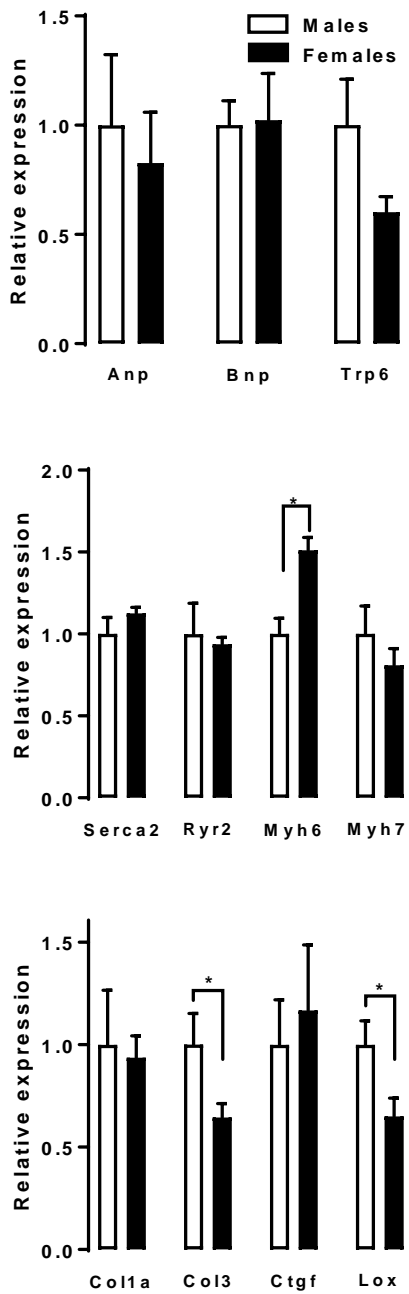

**Figure S1:** Evaluation by real-time quantitative RT-PCR of the LV mRNA levels of various hypertrophy (top two graphs) and extracellular matrix remodeling (bottom) markers in male (white) and female (black) sham-operated animals. Results are reported in arbitrary units (AU) as mean  $\pm$  SEM (n=5-6/gr.). ShM mRNA levels were normalized to 1. \*: p<0.05 between groups.

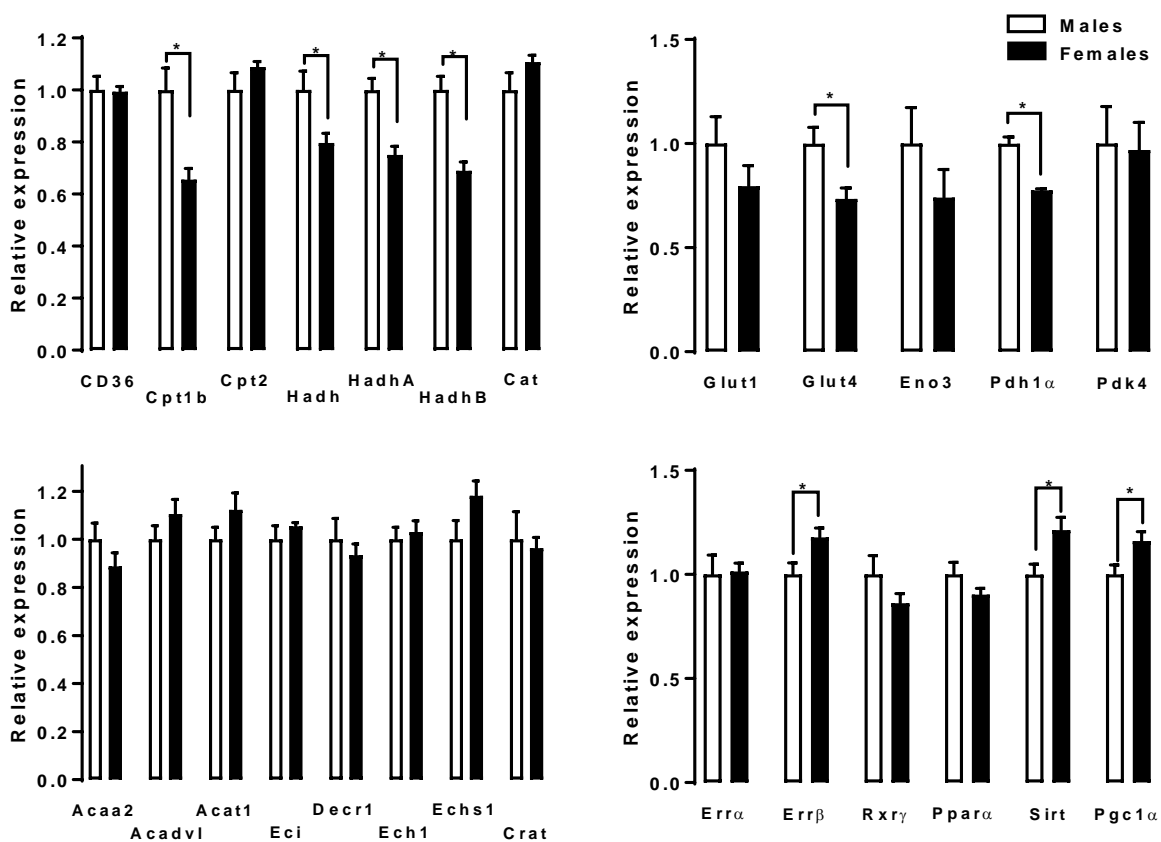

**Figure S2:** Evaluation by real-time quantitative RT-PCR of the LV mRNA levels of genes encoding for enzymes implicated in fatty acid oxidation (left panels), glycolysis (top right panel) and or for transcription factors related to bioenergetics control (right bottom panel) in male (white) and female (black) sham-operated animals. Results are reported in arbitrary units (AU) as mean  $\pm$  SEM (n=5-6/gr.). ShM mRNA levels were normalized to 1. \*: p<0.05 between groups.

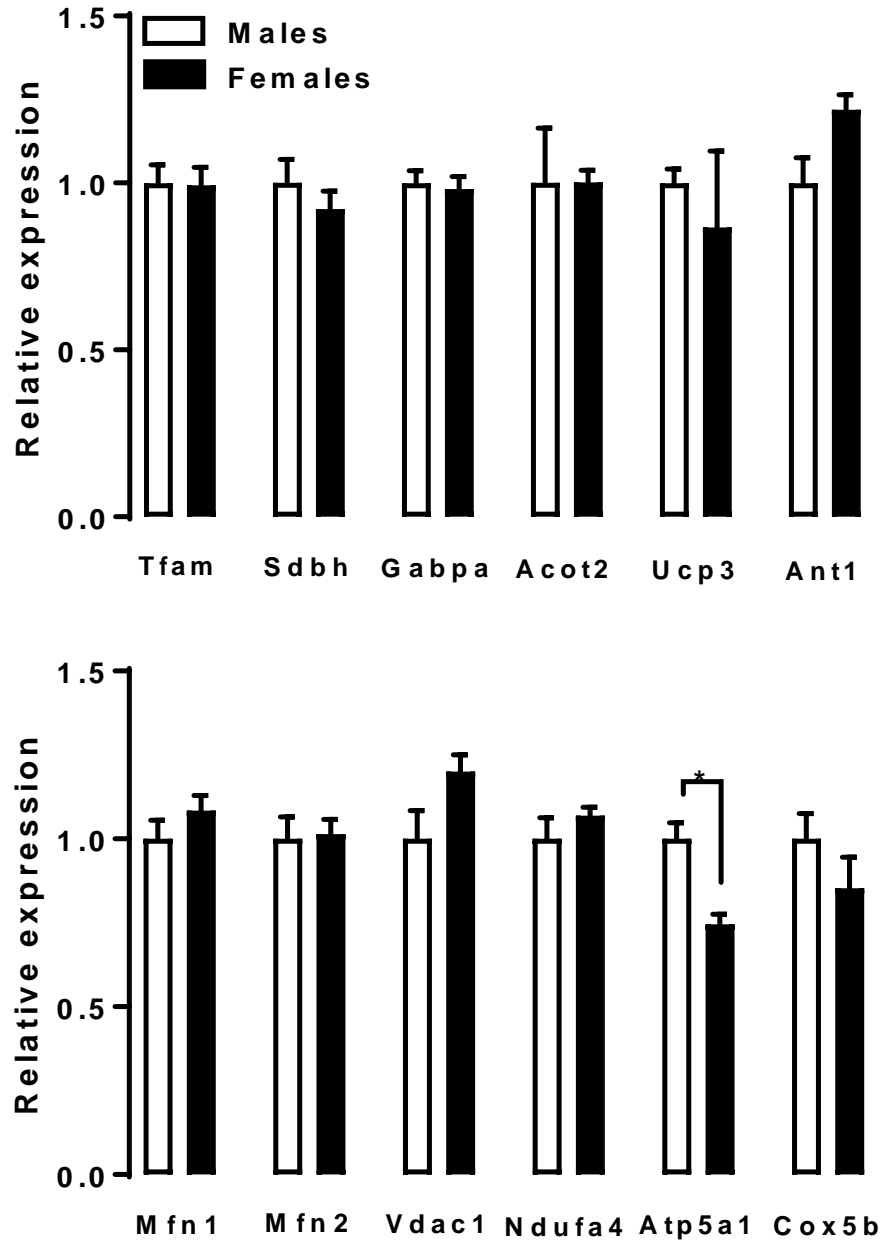

**Figure S3:** Evaluation by real-time quantitative RT-PCR of the LV mRNA levels of genes encoding for markers of mitochondrial biogenesis and function in male (white) and female (black) sham-operated animals. Results are reported in arbitrary units (AU) as mean  $\pm$  SEM (n=5-6/gr.). ShM mRNA levels were normalized to 1. \*: p<0.05 between groups.

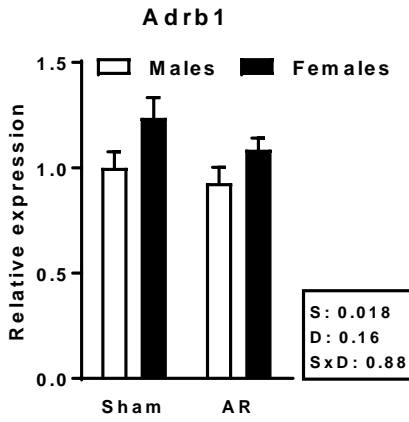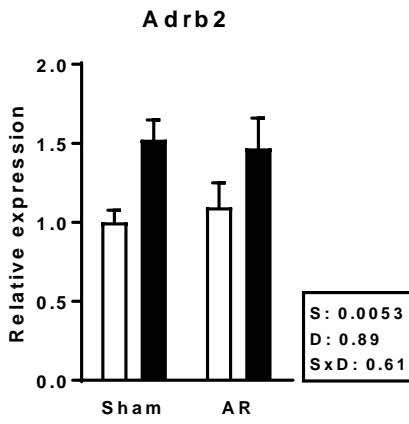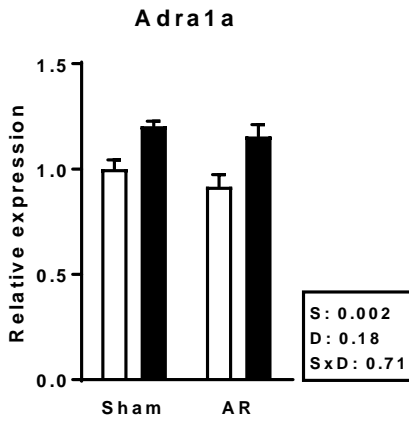

**Figure S4:** Evaluation by real-time quantitative RT-PCR of the LV mRNA levels of genes encoding for adrenergic receptors (beta1, beta2 and alpha1 in male (white) and female (black) sham-operated animals. Results are reported in arbitrary units (AU) as mean  $\pm$  SEM (n=6/gr.). ShM mRNA levels were normalized to 1.
